# 1 The Stochastic Early Reaction, Inhibition, and 2 Late Action (SERIA) Model for Antisaccades

## 3 SERIA - A model for errors and reaction times in the antisaccade task

4  
5 Eduardo A. Aponte<sup>1,\*</sup>, Dario Schoebi<sup>1</sup>, Klaas E. Stephan<sup>1,2</sup>, Jakob Heinzle<sup>1\*</sup>

6  
7

8 <sup>1</sup>Translational Neuromodeling Unit, Institute for Biomedical Engineering, University of  
9 Zurich & Swiss Institute of Technology Zurich, Zurich, Switzerland

10 <sup>2</sup>Wellcome Trust Centre for Neuroimaging, University College London, London, United  
11 Kingdom

12 \*Corresponding authors

13 [aponte@biomed.ee.ethz.ch](mailto:aponte@biomed.ee.ethz.ch)

14 [heinzle@biomed.ee.ethz.ch](mailto:heinzle@biomed.ee.ethz.ch)

15

---

16

## 17 **Abstract**

18 The antisaccade task is a classic paradigm used to study the voluntary control of eye  
19 movements. It requires participants to suppress a reactive eye movement to a visual  
20 target and to concurrently initiate a saccade in the opposite direction. Although several  
21 models have been proposed to explain error rates and reaction times in this task, no  
22 formal model comparison has yet been performed. Here, we describe a Bayesian  
23 modeling approach for the antisaccade task that allows us to formally compare different  
24 models on the basis of their model evidence. First, we provide a formal likelihood function  
25 of actions (prosaccades or antisaccades) and reactions times based on a recently  
26 published model. Second, we introduce the *Stochastic Early Reaction, Inhibition, and late*  
27 *Action model* (SERIA), a novel model that postulates two different types of mechanisms  
28 that interact in the antisaccade task: a race-to-threshold decision process and a binary,  
29 time-insensitive decision process. Third, we apply these models to a data set from an  
30 experiment with three mixed blocks of pro- and antisaccade trials. Bayesian model  
31 comparison demonstrates that the SERIA model explains the data better than competing  
32 models that are based only on race-to-threshold processes. Moreover, we show that the  
33 race-to-threshold decision processes postulated by the SERIA model are, to a large extent,  
34 insensitive to the cue presented on a single trial. Finally, we use the same inversion  
35 technique to infer upon model parameters and demonstrate that changes in reaction time  
36 and error rate due to the probability of a trial type (prosaccade or antisaccade) are  
37 explained mostly by faster or slower inhibition and the probability of generating late  
38 voluntary prosaccades.

39

## 40 **Author summary**

41 One widely replicated finding in schizophrenia research is that patients tend to make  
42 more errors in the antisaccade task, a psychometric paradigm in which participants are  
43 required to look in the opposite direction of a visual cue. This deficit has been suggested  
44 to be an endophenotype of schizophrenia, as first order relatives of patients tend to show  
45 similar but milder deficits. Currently, most statistical models applied to experimental  
46 findings in this task are limited to fit average reaction times and error rates. Here, we  
47 propose a novel statistical model that fits experimental data from the antisaccade task  
48 beyond summary statistics. For this, we suggest that antisaccades are the result of several  
49 competing decision processes that interact nonlinearly with one another. Applying this  
50 model to a relatively large experimental data set, we show that mean reaction times and  
51 error rates do not fully reflect the complexity of the processes that are likely to underlie  
52 experimental findings. In the future, our model could help to understand the nature of the  
53 deficits observed in schizophrenia by providing a statistical tool to study the biological  
54 processes from which they arise.

55

## 56 Introduction

57 In the antisaccade task ([1]; for reviews, see [2, 3]), participants are required to saccade  
58 in the contralateral direction of a visual cue. This behavior is thought to require both the  
59 inhibition of a prepotent saccadic response towards the cue and the initiation of a  
60 voluntary eye movement in the opposite direction. A failure to inhibit the reflexive  
61 response leads to an erroneous saccade towards the cue (i.e., a prosaccade), which is  
62 often followed by a corrective eye movement in the opposite direction (i.e., an  
63 antisaccade). As a probe of inhibitory capacity, the antisaccade task has been widely used  
64 to study psychiatric and neurological diseases [3]. Notably, since the initial report [4],  
65 studies have consistently found an increased number of errors in patients with  
66 schizophrenia when compared to healthy controls, independent of medication and  
67 clinical status [5,6,7,8]. Moreover, there is evidence that an increased error rate  
68 constitutes an endophenotype of schizophrenia, as antisaccade deficits are also present  
69 in non-affected first-degree relatives of diagnosed individuals (for example [5, 7]).  
70 However, not all studies have reported positive evidence for this (for example [9,10]).

71 Unfortunately, the exact nature of the antisaccade deficits and their biological origin in  
72 schizophrenia remain unclear. One approach to improve our understanding of  
73 experimental findings is to develop generative models of their putative computational  
74 and/or neurophysiological causes [11]. Generative models can reveal features of the data  
75 that are not apparent when only considering summary statistics such as mean error rate  
76 (ER) and reaction time (RT) [12]. Additionally, generative models can relate behavioral  
77 findings in humans to their biological substrate.

78 Here, we apply a generative modelling approach to the antisaccade task. First, we  
79 introduce a novel model of this paradigm based on previous race-to-threshold models  
80 [13-16]. For this, we formalize the model introduced by Noorani and Carpenter [15] and  
81 extend it into what we refer to as the *Stochastic Early Response, Inhibition and late Action*  
82 (SERIA) model. We then apply both models to an experimental data set of three mixed  
83 blocks of pro- and antisaccades trials with different trial type probability using formal  
84 Bayesian inference. More specifically, we compare several models using Bayesian model  
85 comparison. Thirdly, we use the parameter estimates from the best model to investigate  
86 the effects of our experimental manipulation. We found that there was positive evidence  
87 in favor of the SERIA model when compared to our formalization of the model proposed

88 in [15]. Moreover, the parameters estimated through model inversion revealed a complex  
89 picture of the decision processes underlying the antisaccade task that is not obvious from  
90 mean RT and ER.

91 This paper is organized as follows. First, we formalize the model developed in [15] and  
92 introduce the SERIA model. Second, we present our experimental setup. Third, in the  
93 results section, we present our behavioral findings in terms of summary statistics (mean  
94 RT and ER), the comparison between different models, and the parameter estimates.  
95 Finally, we review our findings, discuss other recent models, and potential future  
96 developments and translational applications.

97

## 98 **Materials and methods**

### 99 **Ethics statement**

100 All participants gave written informed consent before the study. All experimental  
101 procedures were approved by the local ethics board (Kantonale Ethikkommission Zürich,  
102 KEK-ZH-Nr.2014-0246).

### 103 **Race to threshold models for antisaccades**

104 In this section, we derive a formal description of the models evaluated in this paper. We  
105 start with a formalized version of the model in [15] and proceed to extend this approach.

#### 106 *The pro, stop, and antisaccade model (PROSA)*

107 Following [15], we assume that the RT and the type of saccade generated in a given trial  
108 is caused by the interaction of three competing race-to-threshold units. The first unit  $u_p$   
109 represents a command to perform a prosaccade, the second unit  $u_s$  represents an  
110 inhibitory command to stop a prosaccade, and the third unit  $u_a$  represents a command to  
111 perform an antisaccade. The time required for each unit to arrive to threshold is given by:

$$s_i = r_i t, \quad (1)$$

$$\frac{s_i}{r_i} = t, \quad (2)$$

112 where  $r_i$  represents the slope or increase rate of unit  $i$ ,  $s_i$  represents the height of the  
113 threshold, and  $t$  represents time. We also assume that, on each trial, the increase rates  
114 are stochastic and independent from each other.

115 The time and order in which the units reach their thresholds  $s_i$  determines the action and  
116 RT in a trial. If the prosaccade unit  $u_p$  reaches threshold before any other unit at time  $t$ , a  
117 prosaccade is elicited at  $t$ . If the antisaccade unit arrives first, an antisaccade is elicited at  
118  $t$ . Finally, if the stop unit arrives before the prosaccade unit, an antisaccade is elicited at  
119 the time when the antisaccade unit reaches threshold.

120 Formally (but in a slight abuse of language), the two random variables of interest, the  
121 reaction time  $T \in [0, \infty[$  and the type of action performed  $A \in \{pro, anti\}$ , depend on  
122 three further random variables: the arrival times  $U_p, U_s, U_a \in [0, \infty[$  of each of the units.

123 The probability of performing a prosaccade at time  $t$  is given by the probability of the  
 124 prosaccade unit arriving at time  $t$ , and the stop and antisaccade unit arriving afterwards:

$$p(A = pro, T = t) = p(U_p = t)p(U_a > t)p(U_s > t). \quad (3)$$

125 The probability of performing an antisaccade at time  $t$  is given by

$$p(A = anti, T = t) = \quad (4)$$

$$p(U_a = t)p(U_p > t)p(U_s > t) + p(U_a = t) \int_0^t p(U_s = \tau)p(U_p > \tau)d\tau.$$

126 The first term on the right side of Eq. 4 corresponds to the unlikely case that the  
 127 antisaccade unit arrives before the prosaccade and the stop unit. The second term  
 128 describes trials in which the stop unit arrives before the prosaccade unit. It can be  
 129 decomposed into two terms:

$$p(U_a = t) \int_0^t p(U_s = \tau)p(U_p > \tau)d\tau \quad (5)$$

$$\begin{aligned} &= p(U_a = t) \left( p(U_s < t)p(U_p > t) + \int_0^t p(U_s = \tau)p(\tau < U_p < t)d\tau \right) \\ &= p(U_a = t) \left( p(U_s < t)p(U_p > t) + \int_0^t p(U_s < \tau)p(U_p = \tau)d\tau \right). \end{aligned} \quad (6)$$

130 The term  $p(U_a = t) \int_0^t p(U_s < \tau)p(U_p = \tau)d\tau$  describes the condition in which the  
 131 prosaccade unit is inhibited by the stop unit allowing for an antisaccade. Note that if the  
 132 prosaccade unit arrives later than the antisaccade unit, the arrival time of the stop unit is  
 133 irrelevant. That means that we can simplify Eq. 4 to

$$p(A = anti, T = t) = p(U_a = t) \left( p(U_p > t) + \int_0^t p(U_s < \tau)p(U_p = \tau)d\tau \right). \quad (7)$$

134 Eq. 3 and 7 constitute the likelihood function of a single trial, defining the joint probability  
 135 of an action and the corresponding RT. We refer to this likelihood function as the PRO-  
 136 Stop-Antisaccade (PROSA) model. This model shares the central assumptions of [15]: (i)  
 137 the time to reach threshold of each of the units is assumed to depend linearly on the rate  
 138  $r$ , (ii) it includes a stop unit whose function is to inhibit prosaccades and (iii) both models

139 assume no lateral inhibition between the different units. Finally, (iv) the reaction times  
140 are assumed to be equal to the reach-to-threshold times. Note that the RT distributions  
141 are different from the arrival-time distributions because of the interactions between the  
142 units described above. The main difference of this model compared to [15] is that we do  
143 not exclude *a priori* the possibility of the antisaccade unit arriving earlier than the other  
144 units. Otherwise, both models are conceptually equivalent.

### 145 **The Stochastic Early Reaction, Inhibition, and Late Action Model (SERIA)**

146 The PROSA model is characterized by a strict association between units and action types.  
147 In other words, the unit  $u_p$  leads unequivocally to a prosaccade, whereas the unit  $u_a$   
148 always triggers an antisaccade. This implies that if the distribution of the arrival times of  
149 the units is unimodal and strictly positive, the PROSA model cannot predict voluntary  
150 slow prosaccades with a late peak. Hence, the PROSA model cannot account for slow,  
151 voluntary prosaccades that have been postulated in the antisaccade task [17]. Similarly,  
152 it has been argued that prosaccade RT can be described by the mixture of two  
153 distributions [18]. To account for this, we introduce the Stochastic Early Reaction,  
154 Inhibition and Late Action model (SERIA).

155 According to this model, and in analogy to the PROSA model, an early reaction takes place  
156 at time  $t$  if the early unit  $u_e$  arrives before the late and inhibitory units,  $u_l$  and  $u_i$ ,  
157 respectively. If the inhibitory or late unit arrives before the early unit, a late response is  
158 triggered at the time the late unit reaches threshold. Crucially, both early and late  
159 responses can trigger pro- and antisaccades with a certain probability. Thus, in parallel  
160 to the race-to-threshold processes which determines RTs, an independent, secondary  
161 decision process is responsible for which reaction is generated. Fig. 1 shows the structure  
162 of the SERIA model.



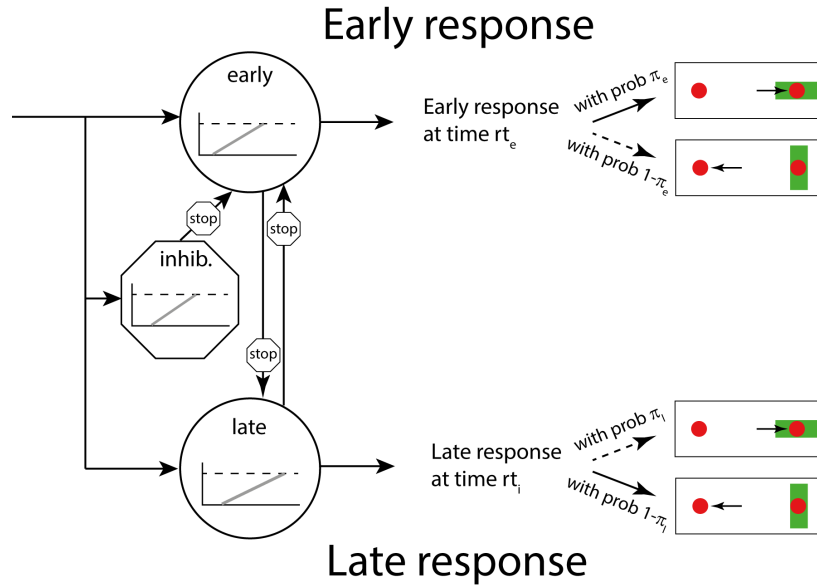

**Fig 1. Layout of the SERIA model.**

The presentation of a visual cue (a green bar) triggers the race of three independent units. The inhibitory unit can stop an early response. Importantly, both early and late responses can trigger pro- and antisaccades. Note that the PROSA model is a special case of the SERIA model in which  $\pi_e = 1$  and  $\pi_l = 0$ , i.e. all early responses are prosaccades, whereas all late responses are antisaccades.

163 To formalize the concept of early and late responses, we introduce a new unobservable  
 164 random variable that represents the type of response  $R \in \{early, late\}$ . The distribution  
 165 of the RTs is analogous to the PROSA-model, such that e.g. the probability of an early  
 166 response at time  $t$  is given by

$$p(R = early, T = t) = p(U_e = t)p(U_i > t)p(U_l > t) \quad (8)$$

167 where  $U_e, U_i$  and  $U_l$  represent the arrival times of the early, inhibitory, and late units  
 168 respectively. The fundamental assumption of the SERIA model is that the action type  
 169 (pro- or antisaccade) is conditionally independent of the RT given the response type  
 170 (early or late). Hence, the distribution of RTs is not *a priori* coupled to the saccade type  
 171 anymore; RT distributions for both pro- and antisaccades could in principle be bimodal,  
 172 consisting of both fast reactive and slow voluntary saccades. Formally, the conditional  
 173 independency assumption can be written down as

$$p(A, T|R) = p(A|R)p(T|R), \quad (9)$$

$$p(A, T|R)p(R) = p(A|R)p(T|R)p(R), \quad (10)$$

$$p(A, T, R) = p(A|R)p(T, R). \quad (11)$$

174 The term  $p(A|R)$  is simply the probability of an action, given a response type. We denote  
175 it as

$$p(A = \textit{pro}|R = \textit{early}) = \pi_e \in [0,1], \quad (12)$$

$$p(A = \textit{anti}|R = \textit{early}) = 1 - \pi_e, \quad (13)$$

$$p(A = \textit{pro}|R = \textit{late}) = \pi_l \in [0,1], \quad (14)$$

$$p(A = \textit{anti}|R = \textit{late}) = 1 - \pi_l. \quad (15)$$

176 Since the type of response  $R$  is not observable, it is necessary to marginalize it out in Eq.  
177 [11] to obtain the likelihood of the SERIA model:

$$p(A, T) = p(A, T, R = \textit{early}) + p(A, T, R = \textit{late}). \quad (16)$$

178 The complete likelihood of the model is given by substituting the terms in Eq. [16]:

$$p(A = \textit{pro}, T = t) = \pi_e p(U_e = t) p(U_i > t) p(U_l > t) + \quad (17)$$

$$\pi_l p(U_l = t) \left( p(U_e > t) + \int_0^t p(U_e = \tau) p(U_i < \tau) d\tau \right),$$

$$p(A = \textit{anti}, T = t) = (1 - \pi_e) p(U_e = t) p(U_i > t) p(U_l > t) + \quad (18)$$

$$(1 - \pi_l) p(U_l = t) \left( p(U_e > t) + \int_0^t p(U_e = \tau) p(U_i < \tau) d\tau \right).$$

179 It is worth noting here that the PROSA model is a special case of the SERIA model, namely,  
180 it corresponds to the assumption that  $\pi_e = 1$  and  $\pi_l = 0$ . The SERIA model allows for  
181 bimodal distributions, as both early and late responses can be pro- and antisaccades.  
182 Importantly, one prediction of the model is that late prosaccades have the same  
183 distribution as late antisaccades.

#### 184 **Non-decision time**

185 The models above can be further finessed to account for non-decision times  $\delta$  by  
186 transforming the reaction times  $t$  to  $t_\delta = t - \delta$ . The delay  $\delta$  might be caused, for example,  
187 by conductance delays from the retina to the cortex. In addition, the antisaccade (or

188 “late”) unit might include a constant delay  $\delta_a$ , which is often referred to as the antisaccade  
 189 cost [1]. Note that the model is highly sensitive to  $\delta$  since any RT lower than  $\delta$  has zero  
 190 probability. In order to relax this condition and to account for early outliers, we assumed  
 191 that saccades could be generated before  $\delta$  at a rate  $\eta \in [0,1]$  such that the marginal  
 192 likelihood of an outlier is

$$p(T < \delta) = p(T_\delta < 0) = \eta. \quad (19)$$

193 For simplicity, we assume that outliers are generated with uniform probability in the  
 194 interval  $[0, \delta]$ :

$$p(T = t) = \frac{\eta}{\delta} \text{ if } t < \delta. \quad (20)$$

195 Furthermore, we assume that the probability of an early outlier being a pro- or  
 196 antisaccade is equal. Because of the new parameter  $\eta$ , the distribution of saccades with  
 197 RT larger than  $\delta$  needs to be renormalized by the factor  $1 - \eta$ . In the case of the PROSA  
 198 model for example this means that now the joint distribution of action and reaction time  
 199 is given by the conditional probability

$$p(A = \textit{pro}, T = t_\delta | t_\delta > 0) = p(U_p = t_\delta) p(U_a > t_\delta - \delta_a) p(U_s > t_\delta), \quad (21)$$

$$p(U_a < 0) = 0, \quad (22)$$

$$p(A = \textit{anti}, T = t_\delta | t_\delta > 0) = \quad (23)$$

$$p(U_a = t_\delta - \delta_a) \left( p(U_p > t_\delta) + \int_0^{t_\delta} p(U_p = \tau) p(U_s < \tau) d\tau \right).$$

200 A similar expression holds for the SERIA model. However, in the PROSA model a unit-  
 201 specific delay is equal to an action-specific delay. By contrast, in the SERIA model both  
 202 early and late responses can generate pro- and antisaccades. Thus, in the case of the  
 203 SERIA model,  $\delta_a$  represents a delay of the late unit that affects both late pro- and  
 204 antisaccades.

## 205 **Parametric distributions of the increase rate**

206 The models discussed in the previous sections can be defined independently of the  
 207 distribution of the rate of each of the units. In order to fit experimental data, we

208 considered four parametric distributions with positive support for the rates: gamma,  
209 inverse gamma, lognormal [19] and the truncated normal distribution (similar to [18]).  
210 Table 1 and Fig. 2 summarize these distributions, their parameters, and the  
211 corresponding arrival time densities. We considered five different configurations: 1) all  
212 units were assigned *inverse gamma* distributed rates, 2) all units were assigned *gamma*  
213 distributed rates, 3) the increase rate of the pro and stop unit (or early and the inhibitory  
214 unit) were *gamma distributed* but the antisaccade (late) unit's increase rate was *inverse*  
215 *gamma* distributed, 4) all the units were assigned *lognormal* distributed rates or 5) all  
216 units were assigned *truncated normal* distributed rates.

**Table 1: Parametric density functions of the increase rates.**

| Name       | Parameters      | Rate p.d.f.                                                                             | Arrival time p.d.f.                                                                       |
|------------|-----------------|-----------------------------------------------------------------------------------------|-------------------------------------------------------------------------------------------|
| Gamma      | $k, \theta$     | $\frac{\theta^{-k}}{\Gamma(k)} e^{-r/\theta} r^{k-1}$                                   | $\frac{\theta^k}{\Gamma(k)} e^{-\theta/t} t^{-k-1}$                                       |
| Inv. gamma | $k, \theta$     | $\frac{\theta^k}{\Gamma(k)} e^{-\theta/r} r^{-k-1}$                                     | $\frac{\theta^{-k}}{\Gamma(k)} e^{-t/\theta} t^{k-1}$                                     |
| Log normal | $\mu, \sigma^2$ | $\frac{1}{\sqrt{2\pi}\sigma} e^{-\frac{1}{2}\left(\frac{\ln r - \mu}{\sigma}\right)^2}$ | $\frac{1}{\sqrt{2\pi}\sigma t} e^{-\frac{1}{2}\left(\frac{\ln t + \mu}{\sigma}\right)^2}$ |
| T. normal  | $\mu, \sigma^2$ | $\frac{1}{Z} e^{-\frac{1}{2}\left(\frac{r - \mu}{\sigma}\right)^2}$                     | $\frac{1}{Z t^2} e^{-\frac{1}{2}\left(\frac{t^{-1} - \mu}{\sigma}\right)^2}$              |

Z is the appropriate normalization constant, i.e.,  $Z = \int_0^\infty \exp\left(-\frac{(r-\mu)^2}{2\sigma^2}\right) dr$ .

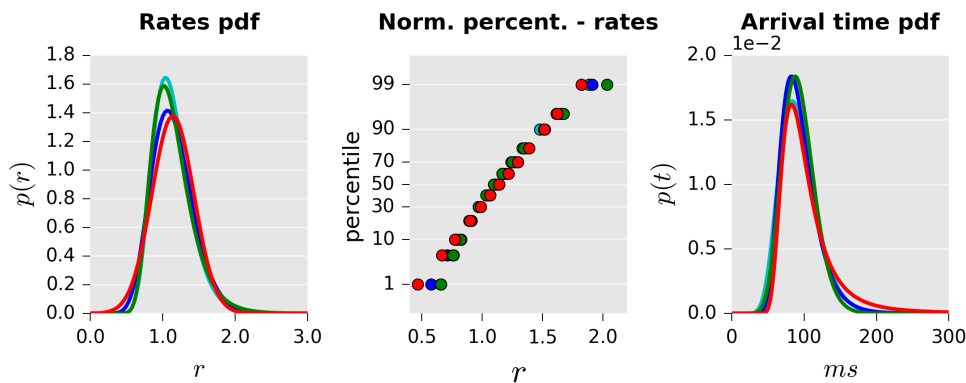

**Fig 2. Illustration of probability distributions used to model increase rates.**

Left: Distribution of the rates based on different probability density functions: Normal (red), gamma (blue), inverse gamma (green) log-normal (cyan). All distributions were matched to have equal mean and variance. Middle: Probit plots of the same distributions. While the gamma and lognormal distributions are very close to the straight line induced by the normal distribution, the inverse gamma distribution diverges slightly more from linearity. Right: Arrival times distribution (scaled to ms).

217 All the parametric distributions considered here can be fully characterized by two  
 218 parameters which we generically refer as  $k$  and  $\theta$ . Hence, the PROSA model is  
 219 characterized by the parameters for each unit  $k_p, k_a, k_s, \theta_p, \theta_a, \theta_s$ . The SERIA model can  
 220 be characterized by analogous parameters  $k_e, k_l, k_i, \theta_e, \theta_l, \theta_i$  and the probabilities of early  
 221 and late prosaccades  $\pi_e$  and  $\pi_l$ . In addition to the unit parameters, both models included

222 the non-decision time  $\delta$ , the antisaccade (or late unit) cost  $\delta_a$ , and the marginal rate of  
223 early outliers  $\eta$ .

224

## 225 **Experimental procedures**

226 In this section, we describe the experimental procedures, statistical methods, and  
227 inference scheme used to invert the models above. The data is from the placebo condition  
228 of a larger pharmacological study that will be reported elsewhere.

### 229 *Participants*

230 Fifty-two healthy adult males naïve to the antisaccade task were invited to a screening  
231 session through the recruitment system of the Laboratory of Social and Neural System  
232 Research of the University of Zurich. During screening, and after being debriefed about  
233 the experiment, subjects underwent an electrocardiogram, a health survey, a visual acuity  
234 test, and a color blindness test. Subjects were excluded if any of the following criteria  
235 were met: age below 18 or above 40 years, regular smoking, alcohol consumption the day  
236 before the experiment, any possible interaction between current medication and  
237 levodopa or benserazide, pulse outside the range 55-100bpm, recreational drug intake in  
238 the past 6 months, history of serious mental or neurological illness, or if the medical  
239 doctor supervising the experiment deemed the participant not apt. All subjects gave their  
240 written informed consent to participate in the study and received monetary  
241 compensation.

### 242 *Procedure*

243 Each subject was invited to two sessions. During both visits, the same experimental  
244 protocol was followed. After arrival, placebo or levodopa (Madopar® DR 250, 200mg of  
245 levopa + 50 mg benserazide) was orally administered in the form of shape- and color-  
246 matched capsules. The present study is restricted to data from the session in which  
247 subjects received placebo. Participants and experimenters were not informed about the  
248 identity of the substance. Immediately afterwards subjects were introduced to the  
249 experimental setup and to the task through a written document. This was followed by a  
250 short training block (see below).

251 The experiment started 70 minutes after substance administration. Subjects participated  
252 in three blocks of 192 randomly interleaved pro- and antisaccade trials. The percentages  
253 of prosaccade trials in the three blocks were 20%, 50%, or 80%. This yielded three  
254 *prosaccade probability* (PP) conditions: PP20, PP50, and PP80. Thus, in the PP20 block,  
255 subjects were presented a prosaccade cue in 38 trials, while in all other trials (154)  
256 subjects were shown an antisaccade cue. The order of trials was randomized in each

257 block, but the same order was used in all subjects and sessions. The order of the  
258 conditions was counterbalanced across subjects.

### 259 *Stimulus and apparatus*

260 During the experiment, subjects sat in front of a CRT monitor (Philipps 20B40, distance  
261 eye-screen:  $\approx 60\text{cm}$ , refresh rate: 75Hz). The screen subtended a horizontal visual angle  
262 of 38 degrees of visual angle (dva). Eye movements were recorded using a remote  
263 infrared camera (Eyelink II, SR-Research, Canada). Participants' head was stabilized with  
264 a chin rest. Data were stored at a sampling rate of 500 Hz.

265 During the task, two red dots (0.25dva), which constituted the saccadic targets, were  
266 constantly displayed at an eccentricity of  $\pm 12\text{dva}$ . Displaying the saccadic target before  
267 the execution of an antisaccade has been reported to affect saccadic velocity and accuracy,  
268 but not RTs [20], and arguably decreases the need for sensorimotor transformations [21].  
269 At the beginning of each trial, a gray fixation cross (0.6 $\times$ 0.6 dva) was displayed at the  
270 center of the screen. After a random fixation interval (500 to 1000 ms), the cross  
271 disappeared, and the cue instructing either a pro- or an antisaccade trial (see below) was  
272 shown centered on either of the red dots. As mentioned above, in each block, subjects  
273 were presented with a prosaccade cue in either 20, 50, or 80 percent of the trials. The  
274 order of the presentation of the cues was randomized. The cue was a green rectangle  
275 (3.48 $\times$ 0.8dva) displayed for 500ms in either horizontal (prosaccade) or vertical  
276 orientation (antisaccade). Once the cue was removed and after 1000ms, the next trial  
277 started.

278 Subjects were instructed to saccade in the direction of the cue when a horizontal bar was  
279 presented (prosaccade trial) and to saccade in the opposite direction when a vertical bar  
280 was displayed (antisaccade trial, see Fig. 3). See [22, 23] for similar task designs.



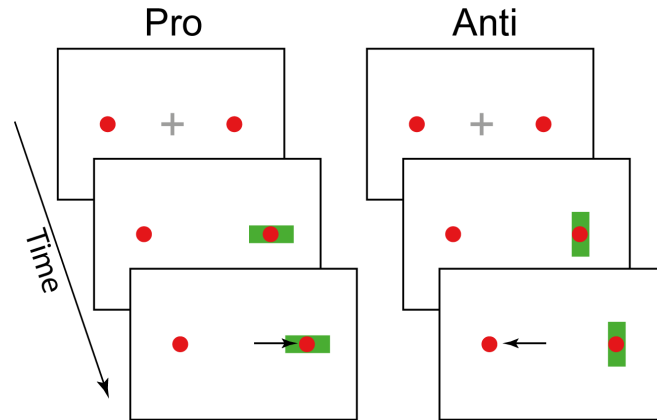

**Fig 3. Task design.**

After a variable fixation period of 500-1000ms (top) the cue (green rectangle) appeared on the screen for 500 ms. The orientation of the cue (horizontal or vertical) indicated the required response (prosaccade or antisaccade).

281 Prior to the main experiment, participants were trained on the task in a block of 50  
282 prosaccade trials, immediately followed by 50 antisaccade trials. During the training,  
283 subjects were automatically informed after each trial whether their response had been  
284 correct or not (see below), or whether they had failed to produce a saccade within 500ms  
285 after cue presentation (CP). Please note that no feedback was given during the main  
286 experimental blocks.

### 287 *Data preparation*

288 Data were parsed and preprocessed using the Python programming language (2.7).  
289 Saccades were detected using the algorithm provided by the eyetracker manufacturer  
290 (SR Research), which uses a velocity and acceleration threshold of  $22dva/s$  and  
291  $3800dva/s^2$  [24]. We only considered saccades with a magnitude larger than  $2dva$ . RT  
292 was defined as the time between CP and the first saccade larger than  $2dva$ . A prosaccade  
293 trial was considered correct if the end position of the saccade was ipsilateral to the cue  
294 and, conversely, an antisaccade trial was considered correct if the end position of the  
295 saccade was contralateral to the cue.

296 Trials were excluded from further analysis if a) data were missing, b) a blink occurred  
297 between CP and the main saccade, c) the trial was aborted by the experimenter, d)  
298 subjects failed to fixate in the interval between fixation detection and CP, e) if a saccade  
299 was detected only later than 800ms after CP, f) if the RT was below 50ms, and in the case  
300 of an antisaccade if it was below 110ms. Corrective antisaccades were defined as saccades

301 that a) followed a prosaccade error, b) occurred no later than 900ms after CP, and c) had  
302 less than 3dva horizontal error from the red circle contralateral to the cue.

303 Besides the fitted non-decision time  $\delta$  we assumed a fixed non-decision time of 50ms for  
304 all participants [15]. This was implemented by subtracting 50ms of all saccades before  
305 being entered into the model. In order to avoid numerical instabilities, RT were rescaled  
306 from millisecond to tenths of a second during all numerical analysis. All results are  
307 presented in ms.

### 308 **Classical statistics**

309 Frequentist analyses of RT and ER were performed using a mixed effects generalized  
310 linear model with independent variables *subject* (SUBJECT), *prosaccade probability* (PP)  
311 with levels PP20, PP50 and PP80, and when pro- and antisaccade trials were analyzed  
312 together, *trial type* (TT). The factor SUBJECT was always entered as a random effect,  
313 whereas PP and TT were treated as categorical fixed effects. In the case of ER, we used  
314 the probit function as link function.

315 Analyses were conducted with the function *fitglm* in MATLAB 9.0. The significance  
316 threshold  $\alpha$  was set to 0.05.

### 317 **Modeling**

318 We aimed to answer three questions with the models analyzed here. First, we  
319 investigated which of the models proposed here (i.e. PROSA or SERIA) explained the  
320 experimental data better, and whether all important qualitative features of the data were  
321 captured by the models. We did not have a strong hypothesis regarding the parametric  
322 distribution of the data. Hence, comparisons of parametric distributions were only of  
323 secondary interest in our analysis. Second, we investigated whether reduced models that  
324 kept certain parameters fixed across trial types were sufficient to model the data. Third,  
325 we investigated how the probability of a trial type in a block affected the parameters of  
326 the model.

#### 327 *Model space*

328 Initially, we defined ten different models as shown in Table 2. Each model was fitted  
329 independently for each subject and condition. Since our experimental design included  
330 mixed blocks, we allowed for different parameters in pro- and antisaccade trials, i.e.,  
331 different increase-rate distributions depending on the TT. Under this hypothesis, the

332 PROSA model had 12 free parameters (6 for each trial type), whereas the SERIA model  
 333 required 4 further parameters ( $\pi_e$  and  $\pi_l$  in pro- and antisaccade trials). Regarding the  
 334 non-decision time  $\delta$ , antisaccade cost  $\delta_a$ , and rate of outliers  $\eta$ , we assumed equal  
 335 parameters in both TT. Consequently, the full PROSA model had 15 free parameters  
 336 whereas the full SERIA model had 19 free parameters.

**Table 2. Model families with the respective increase-rate distributions.**

| <b>PROSA</b>      |                                   |                         |                                 |
|-------------------|-----------------------------------|-------------------------|---------------------------------|
| <b>Model</b>      | <b>Prosaccade/<br/>Stop units</b> | <b>Antisaccade unit</b> | <b># Param.<br/>full/const.</b> |
| $m_1/m_1^c$       | Inv. gamma                        | Inv. gamma              | 15/13                           |
| $m_2/m_2^c$       | Gamma                             | Gamma                   | 15/13                           |
| $m_3/m_3^c$       | Gamma                             | Inv. gamma              | 15/13                           |
| $m_4/m_4^c$       | Lognorm.                          | Lognorm.                | 15/13                           |
| $m_5/m_5^c$       | T. norm.                          | T. norm.                | 15/13                           |
| <b>SERIA</b>      |                                   |                         |                                 |
|                   | <b>Early/Stop units</b>           | <b>Late unit</b>        |                                 |
| $m_6/m_6^c$       | Inv. gamma                        | Inv. gamma              | 19/13                           |
| $m_7/m_7^c$       | Gamma                             | Gamma                   | 19/13                           |
| $m_8/m_8^c$       | Gamma                             | Inv. gamma              | 19/13                           |
| $m_9/m_9^c$       | Lognorm.                          | Lognorm.                | 19/13                           |
| $m_{10}/m_{10}^c$ | T. norm.                          | T. norm.                | 19/13                           |

Models with parameters constrained to be equal across trial types are referred through the superscript <sup>c</sup>.

337 In addition to the full models, we evaluated restricted versions of each model by  
 338 constraining parameters to be shared across TT. In the case of the SERIA model, we  
 339 hypothesized that the parameters of all units were equal irrespective of TT, i.e., that the  
 340 rate of the units was not affected by the cue presented in a trial. However, we assumed  
 341 that the probability that an early or late response was a prosaccade was different in pro  
 342 and antisaccade trials. Therefore, instead of 12 unit parameters (6 per TT), the restricted  
 343 SERIA model had only 6 parameters for the units' rates. The parameters  $\pi_e$  and  $\pi_l$  were  
 344 allowed to differ in pro and antisaccade trials. In the case of the PROSA model, similar to  
 345 [15], it is possible to assume that the parameters of the prosaccade unit remain constant  
 346 across TT, and that parameters of the stop and antisaccade unit depend on TT, yielding  
 347 10 unit parameters.

348 *Prior distributions for model parameters*

349 To complete the definition of our generative models, a prior distribution of the  
 350 parameters was specified. This distribution reflects beliefs that are independent of the  
 351 data and provides a form of regularization when inverting a model. In order to avoid any  
 352 undesired bias regarding the parametric distributions considered here, we  
 353 reparametrize all but the truncated normal distribution in terms of their mean and  
 354 variance. We then assumed that the log of the mean and variance of the rate of the units  
 355 were equally normal distributed (see Table 3). Therefore, the parametric distributions  
 356 had the same prior in terms of their first two central moments. In the case of the truncated  
 357 normal distribution, instead of an analytical transformation between its first two  
 358 moments and its natural parameters  $\mu$  and  $\sigma^2$ , we defined the prior distribution as a  
 359 density of  $\mu$  and  $\ln \sigma^2$ . To warrant that the  $\mu$  was positive with high likelihood (96%) we  
 360 assumed that  $\mu \sim N(0.55, 0.09)$ . The variance term was distributed as displayed in Table  
 361 3. As a further constraint, we restricted the parameter space to enforce that the first two  
 362 moments of the distributions of rates and RTs existed.

**Table 3. Prior probability density functions.**

| Parameter    | Probability density function               | Expected value | Variance |
|--------------|--------------------------------------------|----------------|----------|
| $\mu_r$      | $\mathcal{N}(\ln \mu_r; -1.08, 0.97)$      | 0.55           | 0.5      |
| $\sigma_r^2$ | $\mathcal{N}(\ln \sigma_r^2; -2.64, 0.69)$ | 0.1            | 0.01     |
| $\delta$     | $\mathcal{N}(\ln \delta; -1.58, 1.79)$     | 0.5            | 1.25     |
| $\delta_a$   | $\mathcal{N}(\ln \delta_a; -0.87, 1.17)$   | 0.75           | 1.25     |
| $\pi_e$      | $U_{[0,1]}$                                | 0.5            | 0.08     |
| $\pi_l$      | $U_{[0,1]}$                                | 0.5            | 0.08     |
| $\eta$       | $Beta(\eta; 1,6)$                          | 1/7            | 0.01     |

363 For the non-decision time  $\delta$  and the antisaccade cost  $\delta_a$ , the prior was a lognormal  
 364 distribution equal across all models. Note that the scale of the parameters  $\delta$  and  $\delta_a$  in  
 365 Table 3 is tenths of a second. The distribution of the fraction of early outliers  $\eta$  was  
 366 assumed to be a Beta distribution with parameters 1 and 6 or equivalently

$$p(\eta) \propto (1 - \eta)^5. \quad (24)$$

367 Finally, we assumed that the parameters  $\pi_e, \pi_i$  were uniformly distributed in the interval  
368  $[0,1]$ . Table 3 displays the parameters used for the prior distributions.

### 369 **Bayesian inference**

370 Inference on the model parameters was performed using the Metropolis-Hasting  
371 algorithm [25]. To increase the efficiency of this sampling scheme, we iteratively modified  
372 the proposal distribution during an initial ‘burn-in’ phase as proposed by [26]. Moreover,  
373 we extended this method by drawing from a set of chains at different temperatures and  
374 swapping samples across chains. This method, called population MCMC or parallel  
375 tempering, increases the statistical efficiency of the Metropolis-Hasting algorithm [27]  
376 and has been used in similar contexts before [28]. We simulated 16 chains with a 5-th  
377 order temperature schedule [29], drawing a total of  $2 \times 10^4$  samples per chain, from which  
378 the first half was discarded as part of the burn-in phase.

379 Models were scored using their log marginal likelihood or log model evidence (LME). This  
380 is defined as the log probability of the data given a model after marginalizing out all its  
381 parameters. When comparing different models, the LME corresponds to the log posterior  
382 probability of a model under a uniform prior on model identity. Thus, for a single subject  
383 with data  $y$ , the posterior probability of model  $k$ , given models 1 to  $n$  is

$$p(m_k|y) = \frac{p(y|m_k)p(m_k)}{\sum_{i=1}^n p(y|m_i)p(m_i)} = \frac{p(y|m_k)}{\sum_{i=1}^n p(y|m_i)} \quad (25)$$

384 Importantly, this method takes into account not only the accuracy of the model but also  
385 its complexity, such that overparameterized models are penalized [30]. Widely used  
386 approximations to the LME include the Akaike Information Criterion (AIC) and the  
387 Bayesian Information Criterion (BIC); these are easy to compute but have a limited  
388 concept of complexity (for discussion, see [31]). Here, we computed the LME through  
389 sampling using thermodynamic integration [27, 29]. This method provides robust  
390 estimates and can be easily computed using samples obtained through population MCMC.

391 Besides comparing the evidence of each model, we also performed a hierarchical or  
392 random effects analysis described in [31, 32]. This method can be understood as a form  
393 of soft clustering in which each subject is assigned to a model using the LME as  
394 assignment criterion. Here, we report the expected probability of the model  $r_i$ , which  
395 represents the percentage of subjects that are assigned to the cluster representing model

396 *i.* This hierarchical approach is robust to population heterogeneity and outliers, and  
397 complements reporting the group-level LME. Finally, we compared families of models  
398 [33] based on the evidence of each model for each subject summed across conditions.

### 399 **Implementation**

400 All likelihood functions were implemented in the *C* programming language using the GSL  
401 numerical package (v. 1.13). Integrals without an analytical form or well-known  
402 approximations were computed through numerical integration using the Gauss-Kronrod-  
403 Patterson algorithm [34] implemented in the function *gsl\_integration\_qng*. The sampling  
404 routine was implemented in MATLAB (v. 8.1) and is available as a module of the open  
405 source software package TAPAS ([www.translationalneuromodeling.org/tapas](http://www.translationalneuromodeling.org/tapas)).

406

## 407 Results

### 408 Behavior

409 Forty-seven subjects (age:  $23.8 \pm 2.9$ ) completed all blocks and were included in further  
410 analyses. A total of 27072 trials were recorded, from which 569 trials (2%) were excluded  
411 (see Table 4).

**Table 4. Summary of trials.**

|       | <b>Valid</b> | <b>Blink</b> | <b>Missing</b> | <b>Aborted</b> | <b>FE</b> | <b>Late S.</b> | <b>Early S.</b> | <b>Total</b> |
|-------|--------------|--------------|----------------|----------------|-----------|----------------|-----------------|--------------|
| Total | 26503        | 188          | 60             | 42             | 249       | 0              | 30              | 27072        |
| Mean  | 563.9        | 4.0          | 1.3            | 0.9            | 5.3       | 0.0            | 0.6             | 576          |
| Std.  | 9.9          | 5.1          | 2.5            | 1.5            | 5.0       | 0.0            | 1.3             | -            |
| Min.  | 536          | 0            | 0              | 0              | 0         | 0              | 0               | -            |
| Max.  | 576          | 22           | 15             | 6              | 19        | 0              | 8               | -            |

FE: Fixation errors. Late saccades are saccades elicited after 800ms. Early saccades are prosaccades elicited before 50ms after CP or antisaccades elicited before 110ms after CP.

412 Both ER, and RT showed a strong dependence on PP (Fig 4 and Table 5). The mean RT of  
413 correct prosaccade and antisaccade trials were analyzed independently with two ANOVA  
414 tests with factors SUBJECT and PP. We found that, in both prosaccade ( $F_{2,138} = 46.9, p <$   
415  $10^{-5}$ ) and antisaccade trials ( $F_{2,138} = 37.3, p < 10^{-5}$ ) the effect of PP was significant.  
416 With increasing PP, prosaccade RT diminished, whereas the RT of correct antisaccades  
417 increased. Similarly, there was significant effect of PP on ER (ANOVA with factors  
418 SUBJECT and PP) in both prosaccade ( $F_{2,138} = 376.1, p < 10^{-5}$ ) as well as in antisaccade  
419 ( $F_{2,138} = 347.0, p < 10^{-5}$ ) trials.

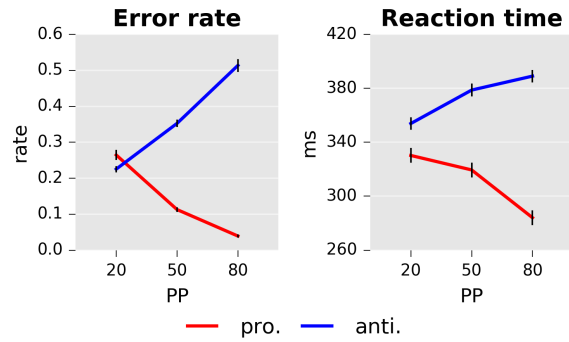

**Fig 4. Error rate and reaction times as a function of prosaccade trial probability (PP).**

Left panel: Mean error rates for prosaccade and antisaccade. Right panel: Mean RT in *ms*. Error bars indicate standard errors of the mean.

420

**Table 5. Summary of mean RTs and ERs.**

|             | Reaction times (ms) |         |         |
|-------------|---------------------|---------|---------|
|             | PP 20               | PP 50   | PP80    |
| Pro.        | 330(72)             | 319(67) | 284(59) |
| Pro. error  | 326(68)             | 329(46) | 336(57) |
| Anti.       | 354(60)             | 378(57) | 389(61) |
| Anti. error | 234(50)             | 231(47) | 225(31) |
|             | Error rates %       |         |         |
| Pro.        | 26(15)              | 11(8)   | 4(4)    |
| Anti.       | 23(17)              | 35(21)  | 51(20)  |

Standard deviations are shown in brackets.

## 421 **Modeling**

### 422 *Model comparison results*

423 In a first step, we considered the models outlined in Table 2. The LME over all participants  
 424 (fixed effects analysis) and the posterior probability of all models and all subjects are  
 425 presented in Fig 5. Independently of the particular parametric distribution of the units,  
 426 the SERIA model showed higher evidence compared to the PROSA model. A random  
 427 effects family-wise model comparison [33] resulted in an expected frequency of  $r = 98\%$   
 428 for the SERIA model family ( $r = 2\%$  for PROSA). In addition, constraining the parameters



429 to be equal across trial types increased the model evidence irrespective of the parametric  
 430 distribution assigned to the units (Fig 5). Here, the family-wise model comparison  
 431 showed that models with constrained parameters had an expected frequency of  $r = 93\%$ .  
 432 Over all 20 models,  $m_8^c$  showed the highest LME with a difference of  $\Delta LME > 78.2$   
 433 compared to all other models. Following [35], a difference in LME larger than 3  
 434 corresponds to strong evidence, roughly equivalent to a p-value of 0.05.

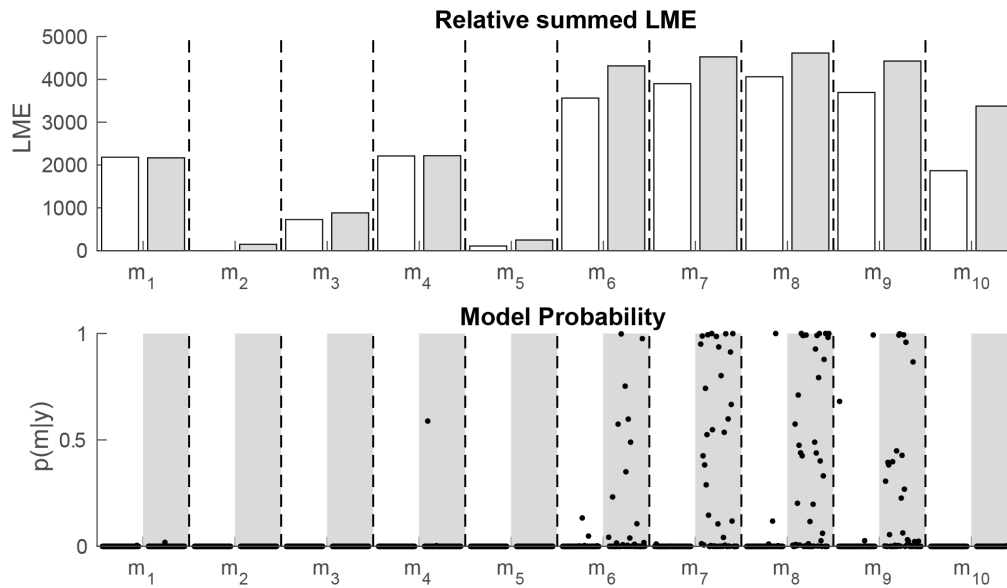

**Fig 5. Summary of model comparison.**

Top: Summed LME across all subjects for all 20 models. White bars show models with all parameters free, grey bars models with restricted parameters. LMEs are normalized by subtracting the lowest LME ( $m_2$ ). Model  $m_8^c$  clearly exceeds all other models ( $\Delta LME > 78.3$ ). Bottom: Illustration of model probability for all individual subjects. The posterior model probabilities for all subjects are shown as black dots for all models individually. In white shading are models with all parameters free, grey bars models with restricted parameters. Note that nearly all subjects show high model probabilities for SERIA models with restricted parameters.

435 In addition to the initially hypothesized models, we performed an additional unplanned,  
 436 post hoc analysis on a refinement of the constrained SERIA family of models, in which we  
 437 fixed the probability of an early antisaccade to a small number ( $\pi_e = 1 - 0.005 \approx 1 -$   
 438  $e^{-5}$ ). Hence, this family of models had 11 free parameters. The relative LME is displayed  
 439 in Fig 6. We found that the most restrictive model was favored ( $r = 88\%$ ) when  
 440 compared to the original ( $r = 5\%$ ) and constrained models ( $r = 7\%$ ). When restricted to  
 441 the models evaluated post hoc, there was very strong evidence in favor of  $m_8^c$  with

442 fixed  $\pi_e$  as compared to other models ( $\Delta\text{LME}>133$ ). If not otherwise stated, in the  
 443 following we restrict the analysis to this model, which we denote as  $\tilde{m}_8^c$ .

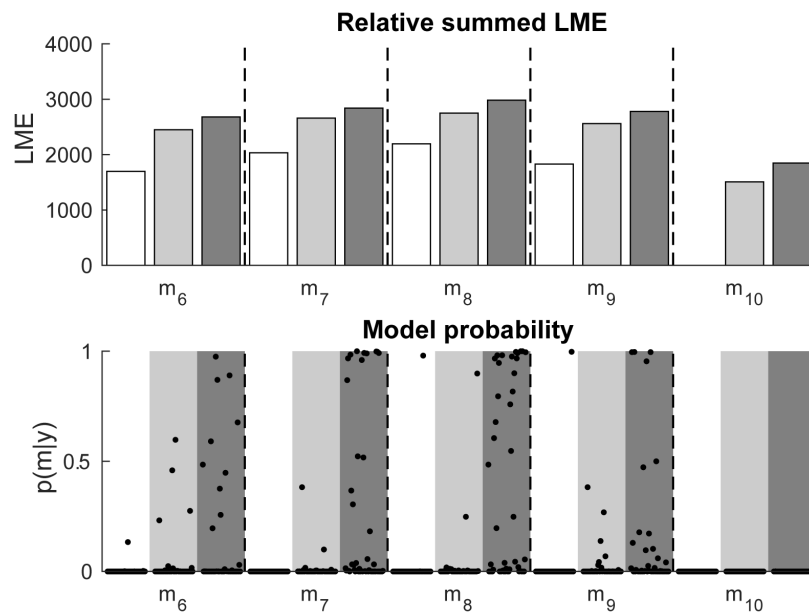

**Figure 6: Post hoc model comparison between SERIA models.**

Top: LME over all participants for the 5 SERIA models. White bars show models with all parameters free, light grey bars models with restricted parameters, and dark grey bars models with fixed prosaccade probability for early responses. LMEs are normalized by subtracting the lowest LME ( $m_{10}$ ). Model  $\tilde{m}_8^c$  with fixed prosaccade probability for early responses clearly exceeds all other models ( $\Delta\text{LME}>133$ ). Bottom: Illustration of the subject wise model probability. The posterior model probability for all subjects are shown as black dots for all models individually. White shaded areas contain models with all parameters free, light grey areas models with restricted parameters and dark grey areas models with fixed early prosaccade probability. Note that nearly all subject show high model probabilities for SERIA models with restricted parameters.

444 Fits of four subjects using the maximum *a posteriori* (MAP) parameter estimates of the  
 445 best PROSA model  $m_4$  and the highest scoring model  $\tilde{m}_8^c$  (SERIA) are depicted in Fig 7  
 446 and Fig 8, respectively. Although model  $m_4$  was the best model in the PROSA family, it  
 447 clearly did not explain the apparent bimodality of the prosaccade RT distributions.  
 448 Instead, RTs were explained through wider distributions. We further examined the model  
 449 fits in Fig 9 by plotting the weighted fits collapsed across subjects. The histogram of RTs  
 450 clearly shows a large number of late prosaccades whose distribution is similar to the  
 451 distribution of the antisaccade RTs. Model  $\tilde{m}_8^c$  captures well the shape of these  
 452 distributions

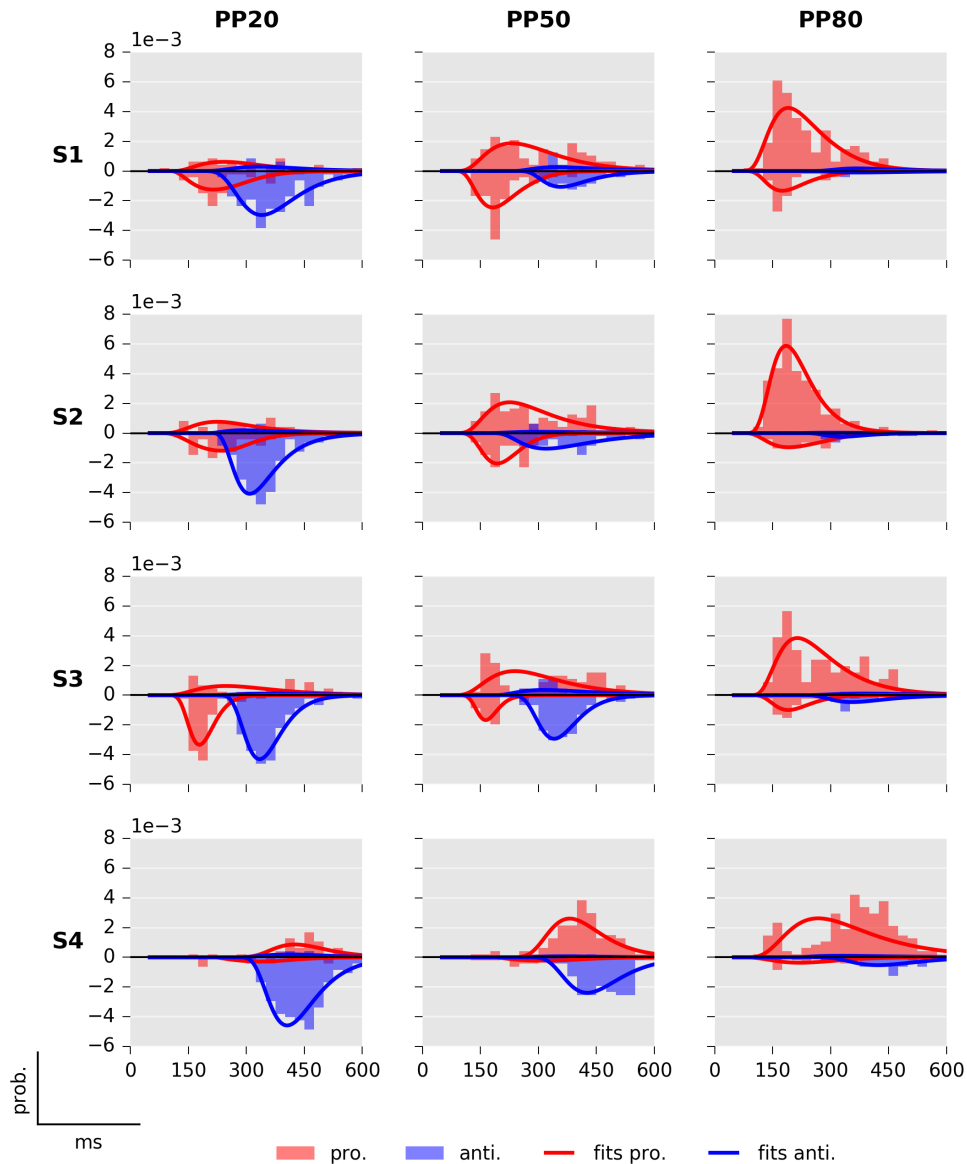

**Fig 7. Fits of best PROSA model  $m_4$ .**

Columns display the normalized histogram of the RTs of pro- (red) and antisaccades (blue) in each of the conditions. Rows correspond to individual subjects (named S1 to S4 for display purpose). Prosaccade trials are displayed on the upper plane, whereas antisaccade trials are displayed in the bottom plane. Thus, blue bars in the upper plane and red bars in the bottom plane indicate errors. The RT distributions based on the MAP estimates are displayed in red (prosaccades) and blue (antisaccades) lines.

453

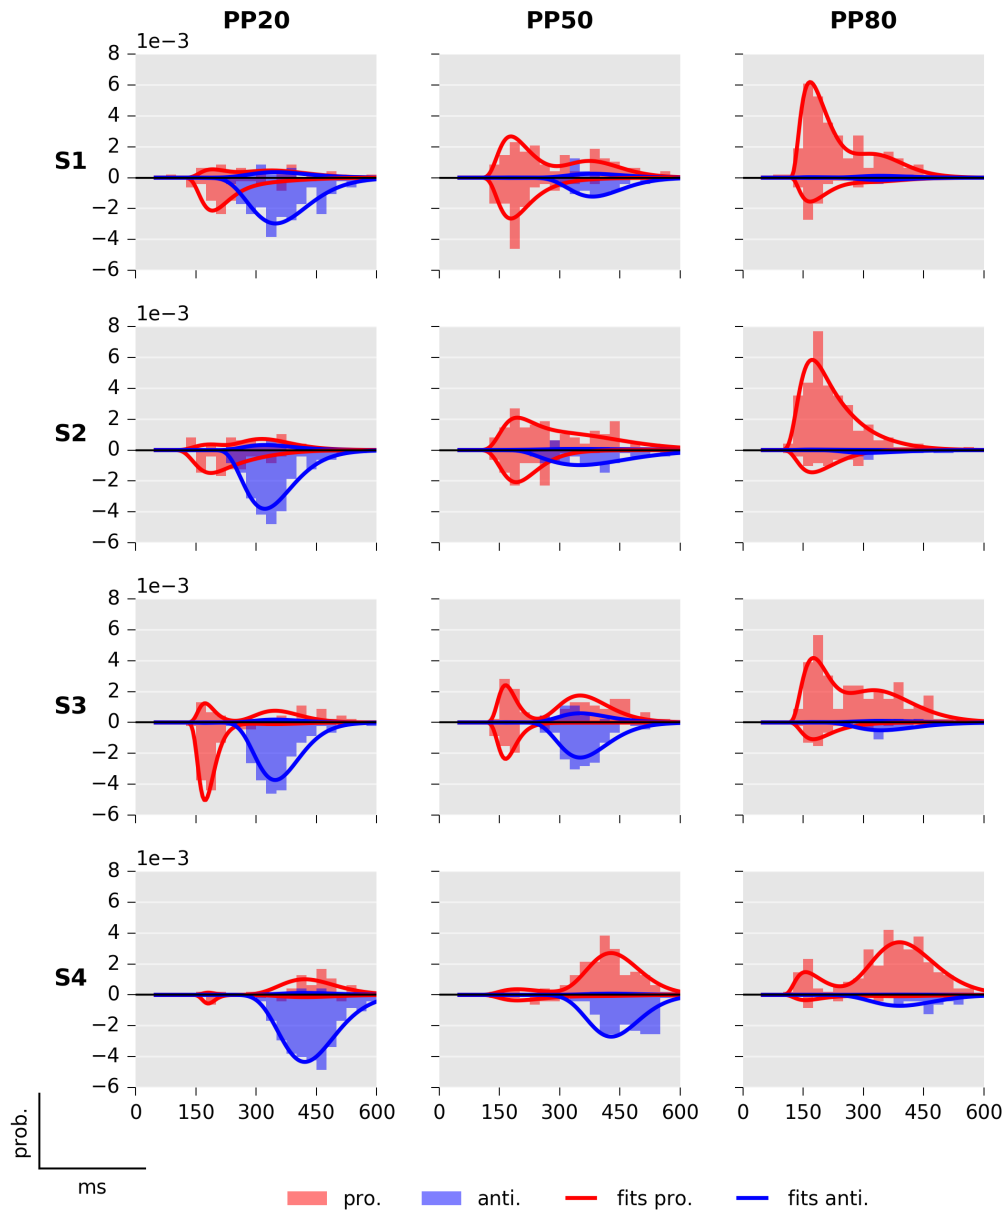

**Fig 8. Fits of best SERIA model ( $\tilde{m}_8^c$ ).**

Fits of four subjects (same as in Fig. 7) using the best scoring model of the SERIA family ( $\tilde{m}_8^c$ ), in which the parameters were fixed across trial types and the probability of early antisaccades was fixed to a small number. Fits are displayed for the three PP conditions. For more details see Fig 7.

454

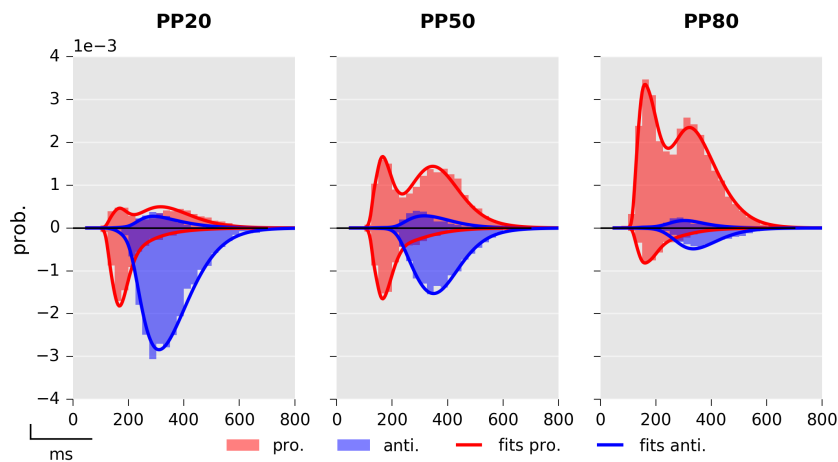

**Fig 9. Fits using MAP estimates of the best model ( $\hat{m}_8^c$ ).**

The fits and RT histograms for each condition are collapsed over subjects. For more details see Fig. 7.

#### 455 *Corrective antisaccades*

456 The RTs of antisaccades that follow an error prosaccade were not directly modeled.  
457 However, we hypothesized that corrective antisaccades are delayed late responses. A  
458 total of 2989 corrective antisaccades were included in the analysis. The mean ( $\pm$ std) end  
459 time of the erroneous prosaccades was 268( $\pm$ 63)ms. The mean RT of corrective  
460 antisaccades was 447( $\pm$ 103)ms, and the weighted mean arrival time of the late unit was  
461 361ms. Fig 10 displays the histogram of the end time of all prosaccade errors, the RT of  
462 all corrective antisaccades and the time shifted (+86ms) predicted arrival times of the  
463 late unit. Since we did not have a strong hypothesis regarding the magnitude of the delay  
464 of the corrective antisaccades, we selected the time shift to be the difference between the  
465 empirical and predicted mean arrival time of the late unit. Visual inspection strongly  
466 suggests that the distribution of corrective antisaccade RTs is well approximated by the  
467 distribution of the late responses. Since the difference between corrective antisaccades'  
468 RT and the expected arrival time of the late is relatively short (86ms), this suggests that  
469 the plan for a corrective antisaccade was started before the initial incorrect prosaccade  
470 has finished.

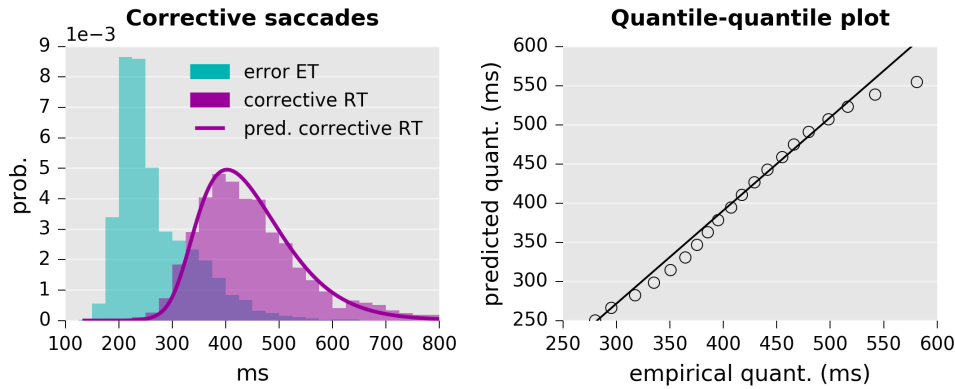

**Fig 10. Empirical and predicted RT of corrective antisaccades.**

Left: End time of erroneous prosaccades, corrective antisaccades RTs, and time shifted predicted arrival times distribution of the late unit. The time shift was selected to match the empirical and predicted mean RT. Right: Quantile-quantile plot of the empirical distribution of corrective antisaccades, predicted distribution, and a linear fit to the central 95% quantiles. There is a large deviation only at the tail of the distribution.

471 *Effects of prosaccade probability on model parameters*

472 The effect of PP on the parameters of the model was investigated by examining the MAP  
 473 estimates of the best scoring model  $\tilde{m}_8^c$ . Initially, we considered the question of whether  
 474 the mean arrival time of each of the units changed as a function of PP. This corresponds  
 475 to

$$E[U_i | k_{MAP}^i, \theta_{MAP}^i] + \delta_{MAP}^i \quad (26)$$

476 where  $i$  is an index over the units and  $\delta_{MAP}$  is the estimated delay. Note that for model  $\tilde{m}_8^c$   
 477 this value can be analytically computed and is equal in pro- and antisaccade trials. Fig 11  
 478 left displays the mean arrival times of each of the units. The expected arrival times were  
 479 submitted to three separate ANOVA tests, which revealed that PP had a significant effect  
 480 on the late ( $F_{2,138} = 13.3, p < 10^{-5}$ ), the inhibition ( $F_{2,138} = 33.3, p < 10^{-5}$ ), and the  
 481 early unit ( $F_{2,138} = 3.1, p = 0.047$ ), although the effect on this unit was relatively weak.  
 482 We then considered the differences across conditions through planned post hoc tests on  
 483 each condition for each of the units (see Table 7). The arrival times of the early unit did  
 484 not change significantly between condition PP20 and PP50, but decreased significantly in  
 485 the PP80 condition as compared to the first two. The arrival times of the late unit  
 486 increased significantly between the PP50 as compared to all other conditions, but there

487 was no significant difference in the PP20 and PP80 conditions. Regarding the inhibitory  
 488 unit, we found that it significantly changed across all conditions.

489

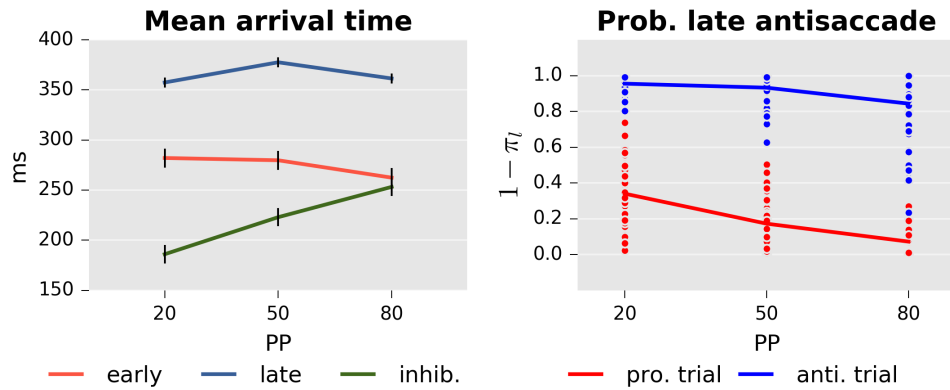

**Fig 11. Model parameters.**

Left: Mean arrival time and standard error of the late, early, and inhibition units.  
 Right: Probability of a late antisaccade  $1 - \pi_l$  in prosaccade (red) and antisaccade (blue) trials in each condition.

490

**Table 6. Post hoc comparison of the effect of PP.**

| Contrast   | Early unit |           |      | Late unit |           |       | Inhib. unit |           |       |
|------------|------------|-----------|------|-----------|-----------|-------|-------------|-----------|-------|
|            | mean       | $t_{138}$ | p    | mean      | $t_{138}$ | p     | mean        | $t_{138}$ | p     |
| PP80 -PP50 | -17.4      | -2.0      | 0.04 | -16       | -3.9      | <0.01 | 30.2        | 3.6       | <0.01 |
| PP80 -PP20 | -19.6      | -2.2      | 0.02 | 4.0       | 0.96      | 0.33  | 67.2        | 8.1       | <0.01 |
| PP50 -PP20 | -0.2       | -0.2      | 0.79 | 20.1      | 4.75      | <0.01 | 36.9        | 4.4       | <0.01 |

Effect of PP on the mean arrival time for each of the units in ms.

491 The arrival times of the late unit showed a peak at PP50 condition suggesting an effect of  
 492 the uncertainty associated with it. The uncertainty about trial type is highest in the PP50  
 493 condition, but equal in the two other conditions. To test this, we performed an unplanned  
 494 analysis in which we entered PP as a linearly increasing regressor and included the  
 495 Shannon entropy or uncertainty associated with each block as a further factor. The  
 496 Shannon entropy is defined as

$$H = -PP \times \ln PP - (1 - PP) \times \ln(1 - PP). \quad (27)$$

497 Since in our initial analysis PP was entered as a categorical variable, this corresponds to  
498 a nested model with one fewer degree of freedom. Results are summarized in Table 8.  
499 While there was a significant effect of PP (but not UNCERTAINTY) on the early and  
500 inhibitory unit, there was a significant effect of UNCERTAINTY (but not PP) on the late  
501 unit.

**Table 7. Effect of PP and UNCERTAINTY on the units' arrival time.**

| Contrast    | Early unit |      |          |          | Late unit |          | Inhib. unit |          |
|-------------|------------|------|----------|----------|-----------|----------|-------------|----------|
|             | DF 1       | DF 2 | <i>F</i> | <i>p</i> | <i>F</i>  | <i>p</i> | <i>F</i>    | <i>p</i> |
| PP          | 1          | 138  | 5.2      | 0.02     | 0.9       | 0.33     | 66.6        | <0.01    |
| UNCERTAINTY | 1          | 138  | 1.0      | 0.31     | 25.8      | <0.01    | 0.2         | 0.63     |

502 Finally, we examined how the probability of a late antisaccade  $1 - \pi_l$  (Fig 11, right)  
503 depended on PP and TT. The estimated parameters for both pro- and antisaccade trials  
504 were analyzed with a model with factors SUBJECT, TT, PP and the interaction between  
505 TT and PP. An ANOVA test demonstrated that both PP ( $F_{2,276} = 33.6, p < 10^{-4}$ ) and TT  
506 ( $F_{1,276} = 658.7, p < 10^{-5}$ ) had a significant effect, but there was no evidence for an  
507 interaction between the two factors ( $F_{2,276} = 0.8, p = 0.44$ ), suggesting that PP affected  
508 the probability of a late antisaccade similarly in pro- and antisaccade trials.

509



## 510 **Discussion**

511 In this study, we provided a formal treatment of error rates (ER) and reaction times (RT)  
512 in the antisaccade task using a probabilistic model. We applied the model to the data from  
513 an experiment with 3 mixed blocks with different probabilities of pro- and antisaccades  
514 trials. Model comparison showed that a novel model that allows for late pro- and  
515 antisaccades, explains our experimental findings better than a model in which all late  
516 responses are assumed to be antisaccades. The parameter estimates of the hidden units  
517 of the model showed that changes in the inhibition unit and changes in the probability of  
518 late prosaccades ( $\pi_l$ ) explained most of the overt changes in behavior caused by our  
519 experimental manipulation, i.e., differences in PP. Moreover, we found that while  
520 inhibition was highly sensitive to the PP in a block, late responses were sensitive to the  
521 uncertainty associated with that block.

### 522 **Influence of trial probability on reaction times and error rates**

523 Our results show that both RT and ER depend on PP. While this was a highly significant  
524 factor in our study, there are mixed findings in previous reports. ER in antisaccade trials  
525 was found to be correlated with trial type probability in several studies [23,36,37].  
526 However, this effect might depend on the exact implementation of the task [37,38].  
527 Changes in prosaccade ER similar to our study have been reported by [23] and [39].  
528 Studies in which the type of saccade was signaled at fixation prior to the presentation of  
529 the peripheral cue do not always show this effect [37]. The results on RTs are less  
530 consistent in the literature. Our findings of increased anti- and decreased prosaccade RTs  
531 with higher prosaccade trial probability are in line with the overall trend in [23] and with  
532 studies in which the cue was presented centrally [23,37]. Often, there is an additional  
533 increase in RT in the PP50 condition [23,37,1], which was visible in our data as a slight  
534 increase in RT in the PP50 condition on top of the linear effect of PP. Overall, RTs in our  
535 study were relatively slow compared to studies with the task cue separated from the  
536 spatial cue [36, 37, 39]. However, a study with a similar design and added visual search  
537 reported even slower RTs in both pro- and antisaccades [23].

### 538 **Interpretation of model comparison results**

539 The formal comparison of generative models can offer insight into the mechanisms  
540 underlying eye movement behavior [11] and might be relevant in translational

541 neuromodeling applications, such as computational psychiatry [41-45]. Here, we have  
542 presented what is to our knowledge the first formal statistical comparison of models of  
543 the antisaccade task. For this, we formalized the model introduced in [15] and proceeded  
544 to develop a novel model that relaxes the one-to-one association of early and late  
545 responses with pro- and antisaccades, respectively. All models and estimation techniques  
546 presented here are openly available under the GPLv3.0 license as part of the open source  
547 TAPAS package ([www.translationalneuromodeling.org/tapas](http://www.translationalneuromodeling.org/tapas)).

548 Bayesian model comparison yielded three conclusions at the family level. First, the SERIA  
549 models were clearly favored when compared to the PROSA models. Second, models in  
550 which race-to-threshold parameters were constrained to be equal across trial types had  
551 a higher LME than models in which all parameters were free. Hence, the effect of the cue  
552 in a single trial was limited to the probability of making a late prosaccade, and did not  
553 directly affect the race-to-threshold process. Third, early responses were nearly always  
554 prosaccades. Crucially, these three conclusions hold in a family comparison across all  
555 parametric distribution of the increase rate of the units.

556 One less obvious but important consequence of our modeling findings is that the decision  
557 to make a late pro- or antisaccade was not ruled by the same race process that governed  
558 RTs. This follows from the main postulate of the SERIA model, namely, the conditional  
559 independence of actions and RTs given response type (early or late). Thus, two  
560 independent and qualitatively different decision processes lead to an antisaccade: the  
561 race-to-threshold process between early and late responses, and the independent  
562 decision process that generates different late responses (pro- vs antisaccades). A similar  
563 separation of eye movement processes into a 'where' and 'when' component has been  
564 proposed by [46], although mainly in conceptual terms.

#### 565 *Parametric distribution of reaction times*

566 The parametric distribution of oculomotor RTs has been discussed in great detail in the  
567 literature (e.g., [47,48]). Here, we did not aim at determining the most suitable  
568 distribution, but rather opted for a practical approach by evaluating different models  
569 with a reduced number of parametric distributions and based our conclusions on the  
570 model with the highest LME. Nevertheless, one can consider the relationship of the  
571 models presented here with other families of parametric distributions. In particular, the  
572 linear relationship

$$\frac{S_i}{r_i} = t \quad (28)$$

573 seems to be inconsistent with the observation that RT are likely to be explained by  
574 stochastic accumulation processes (see for example [49, 50]). However, it can be shown  
575 that if RTs follow a generalized inverse normal distribution (GIN) of the form

$$GIN(t; \lambda, \kappa, \psi) = \frac{(\psi/\kappa)^\lambda}{2K_\lambda(\sqrt{\kappa\psi})} t^{\lambda-1} \exp\left(-\frac{1}{2}(\kappa t^{-1} + \psi t)\right) \quad (29)$$

576 where  $\lambda \leq 0$ , and  $K_\lambda$  is a modified Bessel function of the second kind, there exists a  
577 continuous diffusion process whose first hit distribution (FHD) follows the GIN [51]. A  
578 particular case of this distribution is the Wald distribution for which  $\lambda = -\frac{1}{2}$ ,  $\kappa = 0$ . It is  
579 the FHD of the Brownian diffusion process with drift

$$X_t = -\sqrt{\sigma}\psi t + \sigma W_t \quad (30)$$

580 where  $W_t$  denotes a Wiener process,  $x_0 > 0$ , and the absorbing boundary  $a$  is zero. More  
581 relevant here, when  $\psi = 0$  the distribution reduces to an inverse gamma distribution, the  
582 FHD of the process

$$X_t = \sqrt{\sigma}(2\lambda - 1) t^{-1} + \sigma W_t \quad (31)$$

583 with  $x_0 > 0$  and boundary  $a = 0$  (for a detailed mathematical treatment see [51]). Thus,  
584 if the rates of a ballistic, linear process are assumed to be gamma distributed, the RTs  
585 follow a distribution that is formally equivalent to a first hit model with stochastic  
586 updates and fixed rates. While the model presented here is a ballistic accumulation  
587 model, this equivalence suggests that it is *compatible* with a diffusion process with  
588 infinitesimal mean change proportional to  $t^{-1}$ .

#### 589 *Other antisaccade models*

590 In broad terms, three families of antisaccade models can be distinguished. The first set of  
591 models is based on a race-to-threshold mechanism with independent saccadic and stop  
592 units. These models build on the seminal work by [13] on the stop-signal paradigm.  
593 According to these authors, a 'go' signal triggers a stochastic 'race' process that generates  
594 a response once it reaches threshold. Critically, a stop signal triggers a second process

595 that inhibits the first 'go' response if it is the first to reach threshold. Importantly, the pace  
596 of both units is mutually independent. This model was further extended by [15], who  
597 included a third unit such that an antisaccade is generated when a reflexive prosaccade  
598 is inhibited by an endogenously triggered stop process. Note that the original 'horse-race'  
599 model has also been modified [14] to account for different competing response actions,  
600 similarly as in the antisaccade task. The SERIA model proposed here belongs to this  
601 family.

602 A second type of model relies on lateral or mutual inhibition of competing pro- and  
603 antisaccade units. In this direction, Cutsuridis and colleagues [52] proposed that lateral  
604 inhibition is implement by inhibitory connections in the intermediate layers of the  
605 superior colliculus. Thus, saccades are the result of accumulation processes, but these are  
606 not independent of each other. Crucially, no veto-like stop signal is required. Although no  
607 formal model fitting has been proposed for this model, qualitative agreement with data  
608 suggests that it might capture behavioral patterns relevant in translational applications  
609 [53, 54]. Since no probabilistic version of this model is available, it is currently not  
610 possible to decide on the grounds of model comparison whether mutually dependent or  
611 independent race processes best explain behavioral findings.

612 Finally, several models that incorporate detailed physiological mechanisms have been  
613 proposed [17, 55-57]. These models cannot easily be assigned to one of the above  
614 categories, as they often employ both an inhibitory mechanism that stops or withholds  
615 the reactive responses as well as competition between actions. In addition, while more  
616 realistic models possess a more fine-grained representation of the underlying  
617 neurobiology, they rely on a large number of parameters and it is difficult to fit them to  
618 behavioral data (for discussion, see [11]).

619 Regarding neurobiologically realistic models, the model proposed by [17] is the most  
620 similar to the SERIA model. It posits two different mechanisms that interact in the  
621 generation of antisaccades: an action selection module and a remapping module that  
622 controls the cue-action mapping. As a consequence, this model allows for the generation  
623 of late errors that follow a similar RT distribution as correct antisaccades. Consistent with  
624 this observation, the SERIA model can quantitatively distinguish between inhibition and  
625 decision (cue-action mapping) errors (Fig 12, left panel). A less obvious similarity  
626 between the SERIA model and [17] is that different cues do not lead *directly* to different

627 dynamics in the action module, but only in the so-called ‘remapping’ module. Similarly,  
 628 our model comparison results show that different cues (i.e., trial types) do not affect the  
 629 race process but only the late cue-action mapping expressed in the parameter  $\pi_l$ .

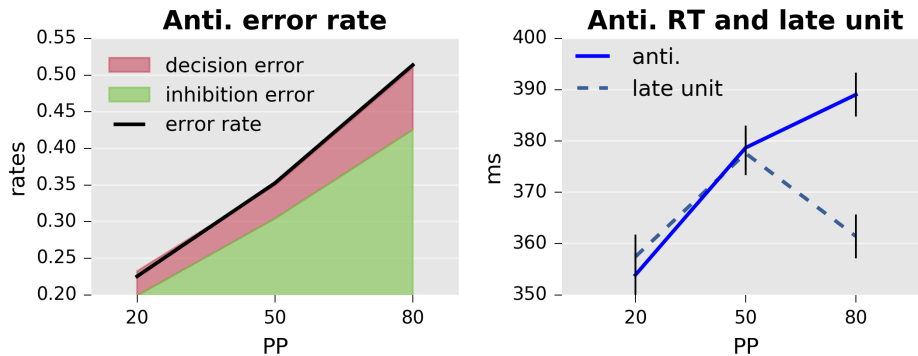

**Fig 12. Error sources and late unit arrival time against antisaccade RT.**

Left: Error rate (black line) split into the two causes predicted by the model. Inhibition errors are early actions that always trigger prosaccades. Similarly as described by [17], decision errors occur when a late response leads to a prosaccade. Right: Mean late unit arrival time and mean antisaccade RTs. Although mean RT increases with antisaccade probability this is due to slower inhibition, not to slower late responses. On the contrary, as uncertainty decreases, late responses are faster.

### 630 **Parameter changes across trial types**

631 One of the most salient results presented here is that models in which the parameters of  
 632 the units were constrained to be equal across trial types had a larger LME than models in  
 633 which all the parameters were free, suggesting that the race units were not affected by  
 634 the cue presented on a single trial. However, while visual inspection of the predicted  
 635 likelihood under the MAP parameters showed that most of the prominent characteristics  
 636 of the data were explained correctly, some more subtle effects were not captured  
 637 accurately by the model, for example, the distribution of late prosaccades in prosaccade  
 638 trials in the PP20 and PP50 conditions. One possible explanation is that restricting the  
 639 parameters across trial types made the model too rigid to capture this effect. Fig 13  
 640 compares the fitted RT distributions for models  $m_8$  and  $\tilde{m}_8^c$ . Although removing the  
 641 constraint on the parameters did improve the fit, the differences are marginal and, thus,  
 642 did not justify the additional model complexity. One might suspect that the distribution  
 643 of late prosaccades was influenced by factors not included in the model such as  
 644 unidirectional switch costs [58] that would be more prominent in the PP20 and PP50  
 645 conditions. Nevertheless, the differences in LME strongly suggest that the cue presented

646 on a given trial had only a marginal effect on the putative race processes that generates  
647 early and late responses. In fact, this example illustrates the protection against overfitting  
648 provided by the LME, as this is a case in which simpler models were preferred over more  
649 complex models despite of slightly less accurate fits.

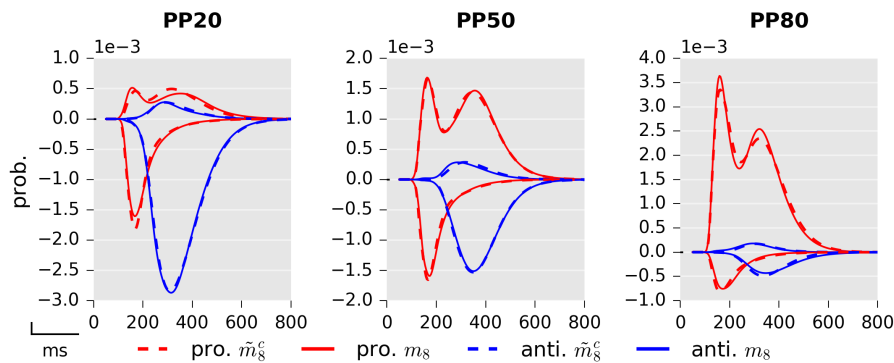

**Fig 13: Comparison between constrained and unconstrained models.**

Comparison between models  $m_8$  (solid lines; all unit parameters are free) and  $\tilde{m}_8^c$  (broken lines; unit parameters are equal across trial types). Only minor differences were observed, mainly in the PP20 condition.

### 650 The effect of trial type probability

651 It is far from obvious why TT probability affects RT and ER in the antisaccade task. One  
652 possible explanation is that increased probability leads to higher preparedness for either  
653 pro- or antisaccades. Such a theory posits an intrinsic trade-off between preparations for  
654 one of the two action types that leads to higher RTs and ERs in low probability trials.  
655 Thus, a trade-off theory predicts that the arrival times of early and late responses should  
656 be anticorrelated. Although this hypothesis can explain our behavioral findings in terms  
657 of summary statistics, our model suggests a more complicated picture.

658 The main explanation of our results is the effect of TT probability on the inhibitory unit  
659 and the probability of a late prosaccade. A higher probability of antisaccade trials led  
660 to faster inhibition and to a higher number of late prosaccades. This resulted in higher  
661 mean RT in prosaccade trials when PP is low. In the case of antisaccades, although the  
662 mean arrival times of the late unit increased in the conditions with highest uncertainty  
663 (Fig 12 right panel), the increased arrival time of the inhibitory unit on the PP80 condition  
664 skewed the antisaccade distribution towards higher RTs.

665 Regarding possible neural correlates of the effect of uncertainty in the responses of the  
666 late unit, a recent study [39] investigated the changes in BOLD signal in a task design

667 similar to ours, in which subjects performed pro- and antisaccades in mixed blocks with  
668 PP of either 25, 50, or 75 percent. When examining the interaction between the TT and  
669 PP factors, four clusters showed a significant activation: precuneus/right middle occipital  
670 gyrus, medial superior frontal gyrus, fusiform gyrus, and right inferior/middle frontal  
671 gyrus. Post hoc analysis revealed that in the prosaccade trials, these areas showed an  
672 increased activation with prosaccade probability, while there were no significant changes  
673 in antisaccade trials. Visual inspection ([39], Fig. 4) suggests that the pattern of activation  
674 change in the antisaccade trials resembled the uncertainty function that characterizes the  
675 arrival time of the late responses in our data. Unfortunately, the authors did not test for  
676 the effect of uncertainty, and thus, we can only speculate that these areas might be  
677 involved in the generation of late responses.

### 678 **Corrective antisaccades**

679 Although not a primary goal of our model, we considered the question of predicting  
680 corrective antisaccades. This problem has received some attention recently [16], as more  
681 sophisticated models of the antisaccade task have been developed. A natural hypothesis  
682 is that the distribution of these RTs should be similar to the distribution of the late  
683 responses. We speculated that these are generated by the very same mechanism that  
684 triggers late responses. Our results strongly suggest that this is the case, as suggested by  
685 visual examination (see Fig 10). The time delay of the corrective antisaccades indicates  
686 that, on average, corrective antisaccades are not the result of the late unit being restarted  
687 at the end time of the erroneous prosaccade, as this would lead to much higher RTs.  
688 Rather, the planning of a corrective antisaccade might be started much before the end of  
689 the execution of an erroneous prosaccade.

### 690 **Summary**

691 Here we have presented a novel model of the antisaccade task. While the basic structure  
692 of the model follows the layout of a previous model [15,16], we have introduced two  
693 crucial advancements. First, we postulated that late responses can trigger both pro- and  
694 antisaccades, which are selected by an independent decision process. Interestingly, a  
695 recent neural network model [17] introduced a comparable solution based on attractor  
696 network dynamics that can yield late erroneous prosaccades. Second, the generative  
697 nature of our model allows for Bayesian model inversion, which enables the comparison  
698 of different models and families of models on formal grounds. To our knowledge this has

699 not been done for any of the previous models of the antisaccade task. This is of relevance  
700 for translational applications that aim at better understanding psychiatric diseases by  
701 means of computational modeling.

702 The application of the model to a large data set yielded several novel results. First, the  
703 race process triggered by different cues is almost identical. Moreover, different PP had  
704 very different effects on the individual units, which was not obvious from the linear  
705 analysis of the mean RT and ER. In particular, late responses are mostly affected by  
706 uncertainty but not by PP. Crucially, our modeling allowed us to look at a mechanistic  
707 explanation of the effects of PP by examining the individual race units. In future work we  
708 aim to disentangle the mechanisms of behavioral differences caused by different drugs  
709 and psychiatric illnesses using formal Bayesian inference.

710

## 711 **Acknowledgments**

712 We thank Saeed Paliwal for comments on the manuscript.

713



714 **References**

- 715 [1] Hallett PE. Primary and secondary saccades to goals defined by instructions. *Vision*  
716 *Res* 1978;18:1279–96.
- 717 [2] Munoz DP, Everling S. Look away: the anti-saccade task and the voluntary control of  
718 eye movement. *Nat Rev Neurosci* 2004;5:218–28.
- 719 [3] Hutton SB, Ettinger U. The antisaccade task as a research tool in psychopathology: a  
720 critical review. *Psychophysiology* 2006;43:302–13.
- 721 [4] Fukushima J, Fukushima K, Chiba T, Tanaka S, Yamashita I, Kato M. Disturbances of  
722 voluntary control of saccadic eye movements in schizophrenic patients. *Biol Psychiatry*  
723 1988;23:670–7.
- 724 [5] Curtis CE, Calkins ME, Grove WM, Feil KJ, Iacono WG. Saccadic disinhibition in  
725 patients with acute and remitted schizophrenia and their first-degree biological  
726 relatives. *Am J Psychiatry* 2001;158:100–6.
- 727 [6] Harris MS, Reilly JL, Keshavan MS, Sweeney JA. Longitudinal studies of antisaccades  
728 in antipsychotic-naïve first-episode schizophrenia. *Psychol Med* 2006;36:485–94.
- 729 [7] Reilly JL, Frankovich K, Hill S, Gershon ES, Keefe RS, Keshavan MS, et al. Elevated  
730 antisaccade error rate as an intermediate phenotype for psychosis across diagnostic  
731 categories. *Schizophr Bull* 2014;40:1011–21.
- 732 [8] Radant AD, Millard SP, Braff DL, Calkins ME, Dobie DJ, Freedman R, et al. Robust  
733 differences in antisaccade performance exist between COGS schizophrenia cases and  
734 controls regardless of recruitment strategies. *Schizophr Res* 2015;163:47–52.
- 735 [9] Crawford TJ, Sharma T, Puri BK, Murray RM, Berridge DM, Lewis SW. Saccadic eye  
736 movements in families multiply affected with schizophrenia: the Maudsley Family  
737 Study. *Am J Psychiatry* 1998;155:1703–10.
- 738 [10] Radant AD, Dobie DJ, Calkins ME, Olincy A, Braff DL, Cadenhead KS, et al.  
739 Antisaccade performance in schizophrenia patients, their first-degree biological  
740 relatives, and community comparison subjects: data from the COGS study.  
741 *Psychophysiology* 2010;47:846–56.
- 742 [11] Heinzle J, Aponte EA, Stephan KE. Computational models of eye movements and  
743 their application to schizophrenia. *Current Opinion in Behavioral Sciences* 2016;11:21–  
744 9. doi:<http://dx.doi.org/10.1016/j.cobeha.2016.03.008>.
- 745 [12] Huys QJ, Maia TV, Frank MJ. Computational psychiatry as a bridge from  
746 neuroscience to clinical applications. *Nat Neurosci* 2016;19:404–13.
- 747 [13] Logan GD, Cowan WB, Davis KA. On the ability to inhibit simple and choice reaction  
748 time responses: a model and a method. *J Exp Psychol Hum Percept Perform*  
749 1984;10:276–91.
- 750 [14] Logan GD, Van Zandt T, Verbruggen F, Wagenmakers EJ. On the ability to inhibit  
751 thought and action: general and special theories of an act of control. *Psychol Rev*  
752 2014;121:66–95.

- 753 [15] Noorani I, Carpenter RH. Antisaccades as decisions: LATER model predicts latency  
754 distributions and error responses. *Eur J Neurosci* 2013;37:330–8.
- 755 [16] Noorani I, Carpenter RH. Re-starting a neural race: anti-saccade correction. *Eur J*  
756 *Neurosci* 2014;39:159–64.
- 757 [17] Lo CC, Wang XJ. Conflict Resolution as Near-Threshold Decision-Making: A Spiking  
758 Neural Circuit Model with Two-Stage Competition for Antisaccadic Task. *PLoS Comput*  
759 *Biol* 2016;12:e1005081.
- 760 [18] Carpenter RH, Williams ML. Neural computation of log likelihood in control of  
761 saccadic eye movements. *Nature* 1995;377:59–62.
- 762 [19] Gorea A, Rider D, Yang Q. A unified comparison of stimulus-driven, endogenous  
763 mandatory and 'free choice' saccades. *PLoS ONE* 2014;9:e88990.
- 764 [20] Edelman JA, Valenzuela N, Barton JJ. Antisaccade velocity, but not latency, results  
765 from a lack of saccade visual guidance. *Vision Res* 2006;46:1411–21.
- 766 [21] Zhang M, Barash S. Neuronal switching of sensorimotor transformations for  
767 antisaccades. *Nature* 2000;408:971–5.
- 768 [22] Sato TR, Schall JD. Effects of stimulus-response compatibility on neural selection in  
769 frontal eye field. *Neuron* 2003;38:637–48.
- 770 [23] Chiau HY, Tseng P, Su JH, Tzeng OJ, Hung DL, Muggleton NG, et al. Trial type  
771 probability modulates the cost of antisaccades. *J Neurophysiol* 2011;106:515–26.
- 772 [24] Stampe D. Heuristic filtering and reliable calibration methods for video-based  
773 pupil-tracking systems. *Behavior Research Methods, Instruments, & Computers*  
774 1993;25:137–42. doi:[10.3758/BF03204486](https://doi.org/10.3758/BF03204486).
- 775 [25] Robert C, Casella G. Monte carlo statistical methods. Springer Science & Business  
776 Media; 2013.
- 777 [26] Shaby E, Well M. Exploring and adaptative Metropolis algorithm. Dep. of Statistical  
778 Sciences Duke University; 2011.
- 779 [27] Gelman A, Carlin JB, Stern HS, Rubin DB. Bayesian data analysis. Chapman;  
780 Hall/CRC; 2003.
- 781 [28] Aponte EA, Raman S, Sengupta B, Penny WD, Stephan KE, Heinzle J. mpdcm: A  
782 toolbox for massively parallel dynamic causal modeling. *J Neurosci Methods*  
783 2016;257:7–16.
- 784 [29] Calderhead B, Girolami MA. Estimating bayes factors via thermodynamic  
785 integration and population MCMC. *Computational Statistics & Data Analysis*  
786 2009;53:4028–45. doi:[10.1016/j.csda.2009.07.025](https://doi.org/10.1016/j.csda.2009.07.025).
- 787 [30] MacKay DJC. Information theory, inference, and learning algorithms. Cambridge  
788 University Press; 2003.
- 789 [31] Stephan KE, Penny WD, Daunizeau J, Moran RJ, Friston KJ. Bayesian model selection  
790 for group studies. *Neuroimage* 2009;46:1004–17.

- 791 [32] Rigoux L, Stephan KE, Friston KJ, Daunizeau J. Bayesian model selection for group  
792 studies - revisited. *Neuroimage* 2014;84:971–85.
- 793 [33] Penny WD, Stephan KE, Daunizeau J, Rosa MJ, Friston KJ, Schofield TM, et al.  
794 Comparing families of dynamic causal models. *PLoS Comput Biol* 2010;6:e1000709.
- 795 [34] Patterson TNL. The optimum addition of points to quadrature formulae.  
796 *Mathematics of Computation* 1968;22:847–56.
- 797 [35] Kass RE, Raftery AE. Bayes factors. *Journal of the American Statistical Association*  
798 1995;90:773–95. doi:[10.2307/2291091](https://doi.org/10.2307/2291091).
- 799 [36] Massen C. Parallel programming of exogenous and endogenous components in the  
800 antisaccade task. *Q J Exp Psychol A* 2004;57:475–98.
- 801 [37] Pierce JE, McDowell JE. Effects of preparation time and trial type probability on  
802 performance of anti- and pro-saccades. *Acta Psychol (Amst)* 2016;164:188–94
- 803 [38] Pierce JE, McDowell JE. Modulation of cognitive control levels via manipulation of  
804 saccade trial-type probability assessed with event-related BOLD fMRI. *J Neurophysiol*  
805 2016;115:763–72.
- 806 [39] Pierce JE, McDowell JE. Effects of preparation time and trial type probability on  
807 performance of anti- and pro-saccades. *Acta Psychol (Amst)* 2016;164:188–94.
- 808 [40] Cornwell BR, Mueller SC, Kaplan R, Grillon C, Ernst M. Anxiety, a benefit and  
809 detriment to cognition: behavioral and magnetoencephalographic evidence from a  
810 mixed-saccade task. *Brain Cogn* 2012;78:257–67.
- 811 [41] Montague PR, Dolan RJ, Friston KJ, Dayan P. Computational psychiatry. *Trends*  
812 *Cogn Sci (Regul Ed)* 2012;16:72–80.
- 813 [42] Wang XJ, Krystal JH. Computational psychiatry. *Neuron* 2014;84:638–54.
- 814 [43] Stephan KE, Mathys C. Computational approaches to psychiatry. *Curr Opin*  
815 *Neurobiol* 2014;25:85–92.
- 816 [44] Paulus MP, Huys QJ, Maia TV. A roadmap for the development of applied  
817 computational psychiatry. *Biological Psychiatry: Cognitive Neuroscience and*  
818 *Neuroimaging* 2016.
- 819 [45] Huys QJ, Maia TV, Paulus MP. Computational psychiatry: From mechanistic insights  
820 to the development of new treatments. *Biological Psychiatry: Cognitive Neuroscience*  
821 *and Neuroimaging* 2016;1:382–5.
- 822 [46] Findlay JM, Walker R. A model of saccade generation based on parallel processing  
823 and competitive inhibition. *Behav Brain Sci* 1999;22:661–74.
- 824 [47] Feng G. Is there a common control mechanism for anti-saccades and reading eye  
825 movements? Evidence from distributional analyses. *Vision Res* 2012;57:35–50.
- 826 [48] Palmer EM, Horowitz TS, Torralba A, Wolfe JM. What are the shapes of response  
827 time distributions in visual search? *J Exp Psychol Hum Percept Perform* 2011;37:58–71.

- 828 [49] Gold JI, Shadlen MN. The neural basis of decision making. *Annu Rev Neurosci*  
829 2007;30:535–74.
- 830 [50] Ratcliff R, Smith PL, Brown SD, McKoon G. Diffusion Decision Model: Current Issues  
831 and History. *Trends Cogn Sci (Regul Ed)* 2016;20:260–81.
- 832 [51] Barndorff-Nielsen O, Blæsild P, Halgreen C. First hitting time models for the  
833 generalized inverse gaussian distribution. *Stochastic Processes and Their Applications*  
834 1978;7:49–54.
- 835 [52] Cutsuridis V, Smyrnis N, Evdokimidis I, Perantonis S. A neural network model of  
836 decision making in an antisaccade task by the superior colliculus. *Neural Networks*  
837 2007;20:690–704.
- 838 [53] Cutsuridis V, Kumari V, Ettinger U. Antisaccade performance in schizophrenia: a  
839 neural model of decision making in the superior colliculus. *Front Neurosci* 2014;8:13.
- 840 [54] Cutsuridis V. Neural competition via lateral inhibition between decision processes  
841 and not a STOP signal accounts for the antisaccade performance in healthy and  
842 schizophrenia subjects. *Front Neurosci* 2015;9:5.
- 843 [55] Brown JW, Bullock D, Grossberg S. How laminar frontal cortex and basal ganglia  
844 circuits interact to control planned and reactive saccades. *Neural Netw* 2004;17:471–  
845 510.
- 846 [56] Heinzle J, Hepp K, Martin KA. A microcircuit model of the frontal eye fields. *J*  
847 *Neurosci* 2007;27:9341–53.
- 848 [57] Wiecki TV, Frank MJ. A computational model of inhibitory control in frontal cortex  
849 and basal ganglia. *Psychol Rev* 2013;120:329–55.
- 850 [58] Weiler J, Heath M. Task-switching in oculomotor control: unidirectional switch-  
851 cost when alternating between pro- and antisaccades. *Neurosci Lett* 2012;530:150–4.
- 852

853 **Supporting Information**

854 **S1\_Dataset.zip. Table of Data.** Spreadsheet including all reaction times, actions and  
855 errors that entered the analysis. More details are included directly in the file.
